# Supplementary material
Source: publisher figshare collection journal article supplement (https://sage.figshare.com/ndownloader/files/24061500)
Supplement: Supplementary file 1 [file 24061500]

# Supplementary Materials

## Supplementary Methods

### *Statistical methods*

#### Survival analysis

To accomplish the two study objectives, four variants of the survival Cox model for repeated events were fitted.

The general formulation of the hazard function for a repeated event survival analysis is as follows:

$$\lambda_{ik}(t; \mathbf{z}_{ik}(t)) = \lambda_{0k}(t) \alpha_i \exp(\boldsymbol{\beta}' \mathbf{z}_{ik}(t))$$

where  $\lambda_{0k}(t)$  is the ordered event-specific baseline hazard for the  $k^{\text{th}}$  event ( $k=1, 2$  PDs).

$\alpha_i$  is the frailty for patient  $i$  assumed as a Gamma  $(1, \theta)$  distributed random variable.

Parameter  $\theta$  represents patient heterogeneity, by which the higher the  $\theta$ , the greater the heterogeneity. The covariate effect is modeled by the term  $\exp(\boldsymbol{\beta}' \mathbf{z}_{ik}(t))$ .  $\mathbf{z}_{ik}(t)$  denotes the covariate vector for the  $i^{\text{th}}$  subject and the  $k^{\text{th}}$  event and includes treatment with B, potential confounders (possibly time-dependent) and an interaction term for the differential effect of B between first-line and second-line treatment. Since the study design entailed a treatment crossover, B was specified as a time-dependent covariate in the statistical analysis.

Model *a*) derives from assuming the common baseline  $\lambda_0(t)$  for all recurrent events.

Models *a*) and *b*) do not include the interaction term for the differential effect of B.

Models *a*), *b*), and *c*) fix the frailty term  $\alpha_i$  at 1 for all patients. Not all randomized patients experienced PD, and, more importantly, not all patients experiencing the first PD were eligible to receive the second-line treatment as planned in the study protocol.

## Calculation of IPCW

The IPCW method aims to reconstruct the complete population, properly weighting the available observations. Therefore, all patient clinical histories post-first PD are, after weighting, representative of the starting population as though the selective withdrawal had never occurred. The weighting formula is as follows:

$$w_{ij} = \prod_{h=0}^j \frac{1}{P(A_{ih} = a_{ih} | C_{ih} = c_{ih})}$$

where  $j$  denotes the number of discrete time intervals defined by time-varying covariate for each  $i^{\text{th}}$  patient.  $A_{ih}$  indicates the selective withdrawal at the second-line treatment for patient  $i$  at time point  $t_{ih}$ ,  $C_{ih}$  variables (time-fixed: age at entry, gender, CT regimen, KRAS mutational status, center, study arm, ECOG PS, tumor localization, LDH-Lactate dehydrogenase; and time-varying: surgery and toxicity) measured right before each time point  $t_{ih}$  for patient  $i$ . The equation is a product over all time points  $\{t_{ih}\}$  from randomization to discrete time point  $t_{ij}$ , for each patient  $i$ . Weights are then stabilized using the observed time-fixed covariates and the covariates used for the stratified randomization (age at entry, gender, KRAS mutational status, and center).

In practice we fit a Cox model for time to second-line treatment ( $A_{ih}$  indicator for the selective withdrawal at the second-line treatment) which estimates the probability of selective withdrawal. This model includes all the  $C_{ih}$  variables measured right before each time point  $t_{ih}$  for patient  $i$ . The IPCW is then the inverse of this probability. To gain in robustness the IPCW is stabilized, *i.e.* calculated as the ratio between the probabilities of selected withdrawals predicted by the Cox model with only the observed time-fixed covariates (age at entry, gender, CT regimen, KRAS mutational

46 status, center, study arm, ECOG PS, tumor localization, LDH-Lactate dehydrogenase);  
47 and, in the denominator, the probabilities of selected withdrawals predicted by the Cox  
48 model with time-fixed and time-varying covariates.
